# Supplementary material for: Towards environmentally friendly processing of ionic liquid-based photoresists with a boosted lithography performance
Source: Royal Society of Chemistry journal article supplement (doi:10.1039/d3gc01520c), 2023-01-01
Supplement: d3gc01520c1.pdf [file d3gc01520c1.pdf]

## Supporting Information

### Towards environmentally friendly processing of ionic liquid based photoresist with a boosted lithography performance

Lifei Liu,<sup>a, b</sup> Kuntong Song,<sup>a, b</sup> Tong Feng,<sup>a, b</sup> Ting Song,<sup>a, b</sup> Jintong Li,<sup>a, b</sup> Shangqing Chen,<sup>a, b</sup> Weizhen Zhao,<sup>\*a, b, c</sup> Suojiang Zhang,<sup>\*a, c, d</sup>

<sup>a</sup> Beijing Key Laboratory of Ionic Liquids Clean Process, CAS Key Laboratory of Green Process and Engineering; State Key Laboratory of Multiphase Complex Systems, Institute of Process Engineering, Chinese Academy of Sciences, Beijing 100190, P. R. China. <sup>b</sup> School of Chemical Engineering, University of Chinese Academy of Sciences, Beijing 100049, P. R. China.

<sup>c</sup> Innovation Academy for Green Manufacture, Institute of Process Engineering, Chinese Academy of Sciences, Beijing 100190, P. R. China.

<sup>d</sup> Longzihu New Energy Laboratory, Zhengzhou Institute of Emerging Industrial Technology, Henan University, Zhengzhou 450000, P. R. China.

Corresponding author. Institute of Process Engineering; CAS, Beijing 100190 (PR China).

E-mail addresses: sjzhang@ipe.ac.cn; wzzhao@ipe.ac.cn;

#### S1 Details for RCA cleaning method:

Details for RCA cleaning method: A 30% H<sub>2</sub>O<sub>2</sub> solution and 98% H<sub>2</sub>SO<sub>4</sub> (in a volume ratio of 3:7) were mixed together by adding H<sub>2</sub>O<sub>2</sub> to H<sub>2</sub>SO<sub>4</sub> slowly, and a silicon wafer was immersed for 45 minutes before being rinsed with deionized water and dried with N<sub>2</sub> gas.

#### S2 Structure characterization of copolymers

As shown in **Figure S1A**, the FT-IR spectrum basically contains all the characteristic peaks of monomers. The peaks at 3059 cm<sup>-1</sup> and 1553 cm<sup>-1</sup> are attributed to the C-H vibration and the C-C skeleton vibration of imidazole ring, respectively. Absorbance at 2956 cm<sup>-1</sup>, 2862 cm<sup>-1</sup>, 1462 cm<sup>-1</sup> and 1388 cm<sup>-1</sup> ascribe to the characteristic peaks of

methyl and methylene in IL, respectively. And the C=O and C-N stretching vibrational peaks located at  $1726\text{ cm}^{-1}$  as well as  $1383\text{ cm}^{-1}$  in DMAEMA were also found. Besides, the =C-H stretching vibration and bending vibration of monomers located at  $1650\text{ cm}^{-1}$  and  $920\text{ cm}^{-1}$  disappeared, indicating that the polymerization occurred completely. For further analyzing the structure of the copolymers, the  $^1\text{H-NMR}$  of the copolymers were also studied. Different from the sharp peaks exhibited by the monomers, the  $^1\text{H-NMR}$  spectrum of the copolymers are mostly broader peaks. As shown in **Figure S1B**, the broad peak around 7.76 ppm was attributable to the imidazole ring of IL, and the other protons on the alkyl chain of the IL are located at 4.2 ppm, 1.9 ppm, 1.4 ppm, 1.0 ppm, respectively. The signals at 4.1 ppm and 2.7 ppm correspond to protons of the methylene in DMAEMA and the broad peak at 2.3 ppm indicate protons of methyl groups attached to the nitrogen atom.

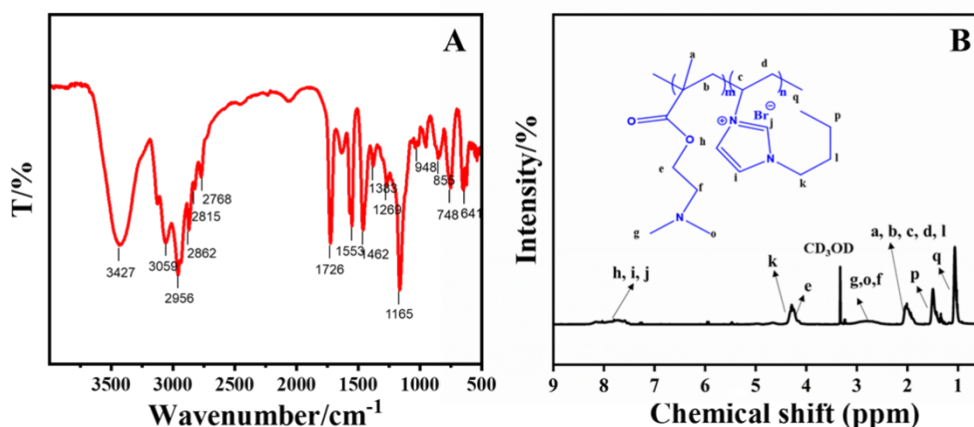

Figure S1. Structure characterization of the synthesized copolymers. A) FT-IR spectrum, B)  $^1\text{H-NMR}$  spectrum in  $\text{CD}_3\text{OD}$

### S3 Soft bake temperature optimization

The soft bake temperature was screened by controlling other lithography process

conditions, and the results are shown in Figure S2. When the temperature is low, especially 60°C and 80°C, the film surface is not smooth and there are more burrs, the pattern effect is poor. When the temperature is increased to 90°C, this phenomenon is improved by the film surface becomes flat, this phenomenon is further increased to 100 °C, so 90°C is the best soft bake temperature.

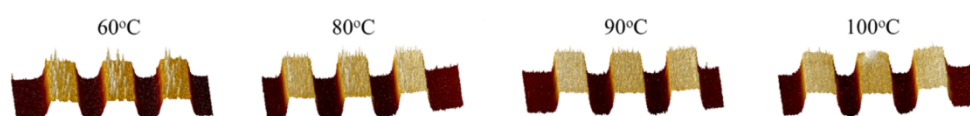

Figure S2: AFM images of patterning pre-baked at different temperature

#### **S4 Post exposure bake temperature optimization**

Similarly, the post exposure bake temperature was optimized. When the baking temperature was set to 90°C, the edges of the pattern showed smooth surfaces, which was not ideal for lithography. When the temperature is raised to 110°C, the edges of the lithographic pattern become angular, and this phenomenon does not change at further increasing the temperature. Considering the thermal stability of the photoresist, the lower after-baking temperature is the most appropriate.

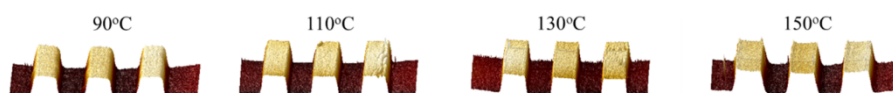

Figure S3: AFM images of patterning post-baked at different temperature

#### **S5 AFM image of photoresist with different IL addition**

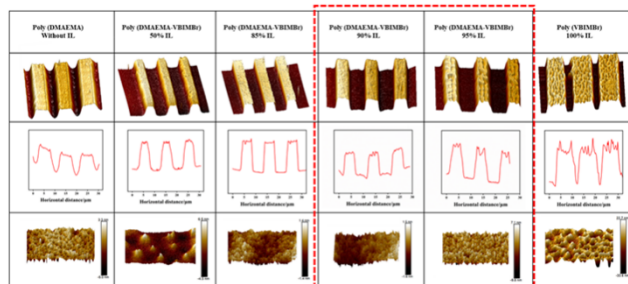

Figure S4. AFM image of photoresist with different IL addition.
